# Supplementary material for: Efficacy of Compound Kushen Injection in Combination with Induction Chemotherapy for Treating Adult Patients Newly Diagnosed with Acute Leukemia
Source: Hindawi journal article supplement (doi:10.1155/2016/3121402), 2016-01-01
Supplement: f1 [file 3121402.f1.pdf]

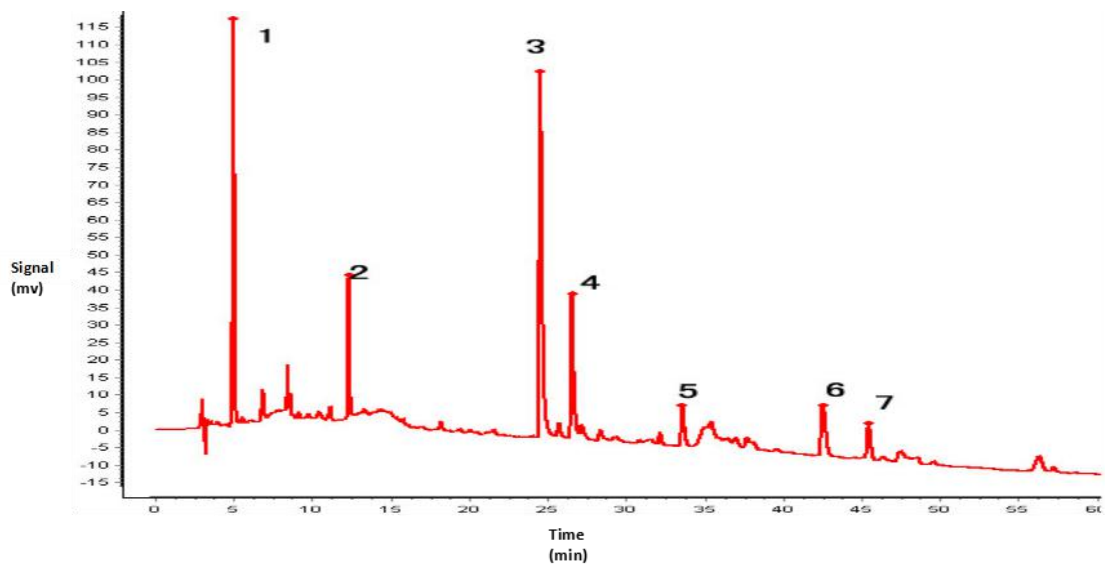

Additional file 1: A representative fingerprint of CKI.

A representative fingerprint of CKI showing 7 common peaks: peak 1, guava base; peak 2, macrozamia; peak 3, oxymatrine; peak 4, oxysophocarpine; peak 5, caulophylline; peak 6, matrine, and peak 7, sophocarpine.
